# Supplementary material
Source: Research Square preprint supplement (doi:10.21203/rs.3.rs-8986443/v1)
Supplement: Supplementary file 1 [file 07bb82f686164dd01278a0b8.docx]

**Interview guides.**

**Background information of respondents**

Age: ...................................................................................................

Sex:………………………………………………………………….

Marital Status:……………………………………………………….

Highest level of education completed:................................................

Occupation:..........................................................................................

Average monthly income:……………………………………………

Tribe/ethnic group:..............................................................................

Place of residence:…………………………………………………...

Religion:...............................................................................................

**In-depth interview/case study guide for patients**

**Section A.**

Enquire about the pathways to Nuclear Medicine services utilisation at the UCH.

1. Where was the first place you visited, when you fell ill?

Probe for:

1. Place of visit
2. Subsequent visits
3. If UCH is the first hospital you visited, why and how?
4. What services were you using before you were referred to the Nuclear Medicine Department?

Probe for:

1. Prayer houses
2. Traditional Healers
3. Herbs
4. Radiology
5. Surgery
6. Have you ever heard about NM before you were referred to use the service?
7. Please explain how you got to Nuclear Medicine Department

Probe for:

1. Where, When and How did you get to hear about Nuclear Medicine Services?
2. What was your source of information? E.g. Social Media, Mass media, Doctor, Friends?
3. Explain how you used Nuclear Medicine diagnostic and treatment services

Probe for:

1. When did you use Nuclear Medicine diagnostic and treatment services?
2. What did you use nuclear imaging to diagnose?

**Section B**

To determine patient’s accessibility to nuclear medicine services at UCH Ibadan.

- - - 1. What can you say about your access to Nuclear Medicine services?

Probe for:

How do you access NM services

Location

Distance

Protocols

Availability?

When do you have access to Nuclear Medicine services?

Cost of access

- - - 1. What other factors determine access to Nuclear Medicine services?

Probe for:

1. Economic
2. Geography
3. Physical
4. Impact of family and significant others

4. Can you please explain how your economic status influences your access and utilisation of Nuclear Medicine services?

Probe for:

a. Where do you work?

b. What is your average income per month?

c. Do you have any other source of income?

5. What can you say about the costs of nuclear medicine diagnosis?

Probe for:

a. Is the cost affordable?

b. What can you say about your ability to pay for the services?

6. In your view, do you think that a Nuclear Medicine service is expensive/cheap?

Probe for:

a. Why do you think the services are expensive/cheap?

7. How are you able to pay for the services?

Probe for:

a. personally

b. family support

c. religious support

d. social group

e. place of work

f. personal health insurance.

8. What are the challenges encountered in paying for the services?

**Section** C

To examine the social determinants of Nuclear Medicine utilisation

1. Please what can you say about the influence of family on your utilisation of Nuclear Medicine services

Probe for:

a. Family support for your utilisation of Nuclear Medicine services?

i. family financial support

ii. psychological/emotional support

iii. Spiritual support

iv. Physical support

2. What are the procedures involved in utilisation of nuclear medicine services?

Probe for:

1. Were you given information by the health care provider?
2. Through which medium was the information given?
3. Do the health care providers educate you?
4. What was their attitude towards you when you seek for explanation about the diagnosis?
5. What can you say about your agreement to the treatment procedures when the health care providers explained to you?
6. What role does social relationship play in your utilisation of NM services?

Probe for:

a. What specific role does your family, friends, religious group and Colleagues at work place/ market place play in your utilisation of NM services?

4. What role does your cultural belief play in your utilisation of nuclear medicine?

Probe for:

a. Cultural beliefs about health and illness?

b. Do your cultural beliefs allow you to utilise Nuclear Medicine services?

c. What are the heath care practices that are forbidden in your culture?

5. What role does your faith play in your utilisation of nuclear medicine?

Probe for:

a. Your religious faith affiliation?

b. The subdivision of the religious faith you belonged to (Pentecostal or Orthodox, Ansarudeen, Quraishi, Alu-Sunna, Amadiyya, Nasfat)?

c. What can you say about your faith belief doctrine as regards the utilisation of health care services?

6. What are those things that are taboos in your culture that can prevent you from using NM?

7. What role do those taboos play in your utilisation of Nuclear Medicine?

**Section D**

To assess the gender issues in Nuclear Medicine utilisation

1. What are the effect of sex (male or female) on access and utilisation of NM?

Probe for:

a. What can you say about your sex and utilisation of nuclear medicine?

b. Will you say your sex puts you at an advantage or disadvantage?

2. Who make decision about your access and utilisation of nuclear medicine services?

Probe for:

a. What can you say about your decision making?

b. Do you take permission from your spouse before accessing and utilising nuclear medicine?

c. Factors that determine decisions making for utilising NMS (economic status, nature of illness)

3. Who bear the financial brunt of your medical care?

Probe for:

1. Husband/wife
2. Parents
3. Family members
4. Religious group
5. NGOs/fund raising

4. What can you say about your partner’s emotions for you when going through NM service?

Probe for:

a. reasons for such emotional reactions?

5. What can you say about your partner’s support in specific terms?

Probe for:

1. Financial support
2. Emotional support
3. Spiritual support
4. Moral Support

**Section E**

To determine patient’s satisfaction with nuclear medicine processes of diagnosis.

1. What can you say about your satisfaction with NM procedures?
2. Please can you explain your satisfaction with the information provided to you before starting the procedure?
3. What was experience with NM services?
4. What can you say about your satisfaction with?

Probe for:

- 1. Waiting time (delayed or fast)
  2. Cost
  3. How were you attended to?
  4. Attitude of health care providers
  5. Appointment system.

1. How does your communication/relationship with the health care providers influence your utilisation of Nuclear Medicine services?

Probe for:

a. Do they communicate with you very effectively?

b. What can you say about the information given to you by the health care providers?

c. What is their attitude towards you?

d. How satisfied are you with the information provided by the health care providers and their attitudes to you?

6. What do you think can be done to improve NM services in Nigeria?

**Key informant interview guide.**

1. Please what can you say about availability, accessibility and utilisation of nuclear medicine facility in this hospital?

Probe for:

a. Number of facilities available

b. When is the facility installed?

c. Who installed it (government, donation, individual, NGOs) the hospital management, through grant etc?

d. Is it functioning well?

e. Availability of necessary equipment for diagnosis and therapy

f. Number of patients attended to in a day

g. Does it meet the needs of those that want to use the service?

1. How accessible is the service?

Probe for:

1. Physical
2. Distance
3. Packing space
4. Inpatient and Outpatient services
5. Cost of services
6. Affordability
7. Outright payment or instalment.
8. Time spent.
9. Bureaucratic process.
10. Please which sex access the services most?

Probe for:

1. Female or male
2. Age of those that are accessing the services more
3. Do one sex have access more than the other
4. What is your view about patients’ awareness of Nuclear Medicine services?

Probe for:

How

When

1. Are there social factors that determine utilisation of Nuclear Medicine services?

Probe for:

1. Family
2. Social relationship
3. Communication
4. Stigma and stereotype
5. Cultural factors-beliefs, faith taboos.
6. Please what can you say about the diagnosis and treatment outcomes?
7. What can you say about patients satisfaction with Nuclear Medicine procedures?
8. What are the challenges of Nuclear Medicine services in this hospital?
9. What do you think that government can do to improve Nuclear Medicine services in Nigeria?
